# Supplementary material
Source: publisher site journal article supplement (https://www.dovepress.com/article/364520)
Supplement: Supplementary file 1 [file get_supplementary_file.php]

**Supplementary Table I.** Final items retained

|  | Objectives of the educational program |
| --- | --- |
| 1. Normal swallowing vs. difficulty swallowing | Explain the normal mechanism of swallowing. |
| Explain the role of coordination between breathing and swallowing and recognize the impact of the underlying cause of dysphagia on the breathing mechanism.  **Explanation:** *during swallowing, breathing is interrupted for about a second. Stopping breathing constitutes one of the systems of protection against aspiration.* |
| Identify possible places of disturbance during the passage of food between the mouth and the stomach.  **Explanation:** *the place of disturbance would be presented specifically for each patient.* |
| 1. Aspiration | Apply suitable actions to deal with aspiration.  **For example:***reassure, promote relaxation and carry out slight ventilation without trying to take in a large amount of air; stop breathing and cough hard; if the person is choking and cannot speak, apply first aid procedures such as the Heimlich maneuver.* |
| Distinguish and recognize wrong attitudes when dealing with aspiration.  **For example:** *giving a drink, patting on the back, giving a piece of bread are wrong attitudes.* |
| 1. Symptoms of OD | Describe and locate the different signs and symptoms of oropharyngeal dysphagia.  **For example** *choking, suffocation, sweating, coughing, change of skin, or lip color.* |
| 1. Consequences of OD | List the consequences of oropharyngeal dysphagia.  **For example** *pneumonia, weight loss, malnutrition, dehydration.* |
| 1. Oral hygiene | Explain the link between good oral/dental hygiene and swallowing disorder. |
| Choose the appropriate tool and apply the gestures effectively to achieve good oral and dental hygiene.  **For example:** *choose from i) a toothbrush and/or toothpaste, ii) mouthwash, iii) a tongue depressor and/or gauze.* |
| 1. Specific rehabilitation | Apply specific rehabilitation exercises to improve swallowing.  **For example** *the Masako exercise, the effortful swallow exercise, the Shaker exercise* |
| 1. Compensatory strategies | Identify and correct environmental adaptations and the behavior of the surrounding for a safe meal.  **For example:** *do not talk while eating, do not watch TV while eating, give attention to meal presentation, adjust the patient's posture.* |
| Know how to efficiently prepare food textures and make the right choice according to the patient's needs.  **For example:** *grind food in the machine or mash it with a fork, add sauce to food.* |
| Choose foods and drinks to get the recommended calorie and water intake. |
| 1. Tracheostomy cannula   ***The objectives are exclusively addressed according to the case and the needs of each patient and their caregiver.*** | Explain the potential benefits of tracheostomy. |
| Demonstrate the tracheostomy cannula care process.  **For example:** *how to clean the cannula, how and when to inflate/deflate the cuff.* |
| Carry out the technical gestures related to tracheotomized patients during meals.  **For example:** *how and when to inflate/deflate the cuff, aspiration of residues.* |
| 1. Enteral feeding   ***The objectives are exclusively addressed according to the case and the needs of each patient and their caregiver.*** | Identify complications of enteral feeding  **For example** *diarrhea, reflux, nausea, vomiting.* |
| Understand how to apply tips to better manage enteral feeding.  **For example**: *administer medication through the gastrostomy tube, rinse the gastrostomy tube with water before and after meals, clean around the gastrostomy tube or nasogastric tube.* |
| 1. Communication of health needs | Communicate health needs with your health professional.  **For example***communication of the need to ask a nutritionist to quantify the patient's calorie and water intake, communication of the need to have an attentive caregiver, communication of difficulties in applying therapeutic recommendations on a day-to-day basis, expressing to the speech therapist that one did not understand, for example how to perform the exercise.* |
| 1. Help and support | Identify and solicit the people who support the patient with dysphagia and their caregiver.  **For example,** *a medical or paramedical professional or a psychologist, family, relatives, support groups on social networks, associations, ask for help to assert their health rights, such as social or financial assistance ...* |
| Identify and use resources of the healthcare system by the patient with dysphagia and his/her caregiver.  **For example:** *knowing whom to contact to set the calorie intake and water required and organize the diet like the nutritionist, know where to go to treat cases of suffocation, or identify the development of dysphagia like the ENT doctor if necessary.* |
| 1. Managing stress | Mastering strategies to help manage the stress that accompanies dysphagia.  **For example:** *how to solve problems related to dysphagia, time management during the day, relaxation.* |
| 1. Appropriation of dysphagia | Describe your story experience from the onset of dysphagia and plan your life project.  ***Explanation:*** *how to envision life and mourn certain projects or ideas as well as rebuild your life project.* |
